# Supplementary material
Source: PubMed Central journal article supplement (PMC6331006)

Figure S1 Related to Figure 1

A

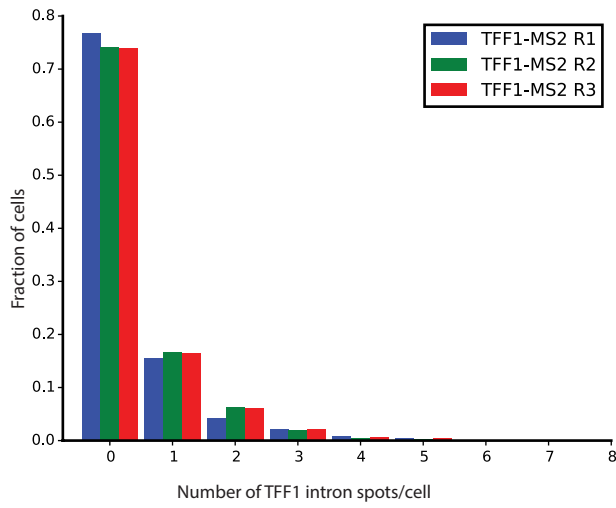

B

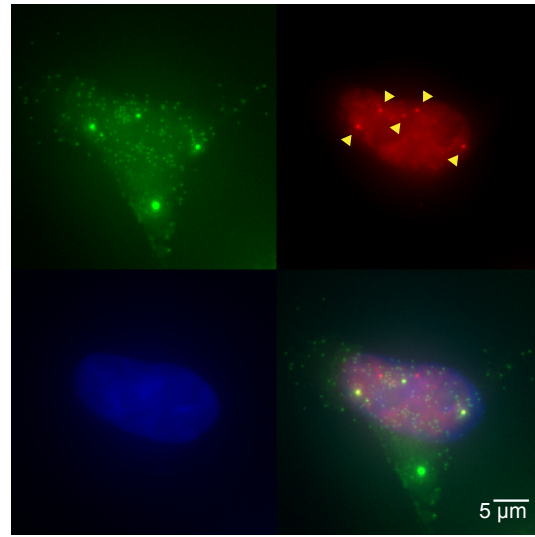

C

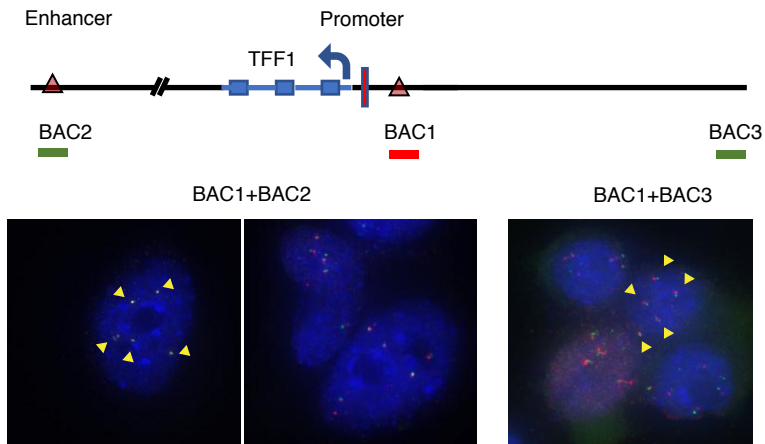

D

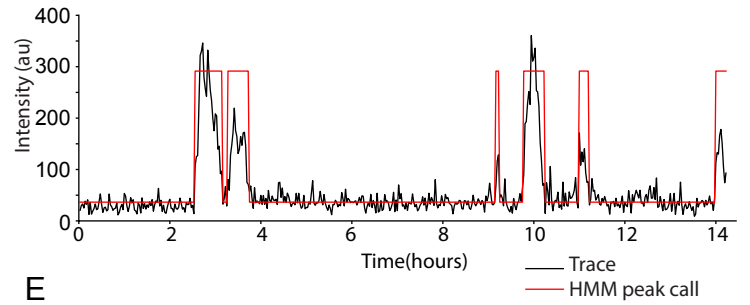

E

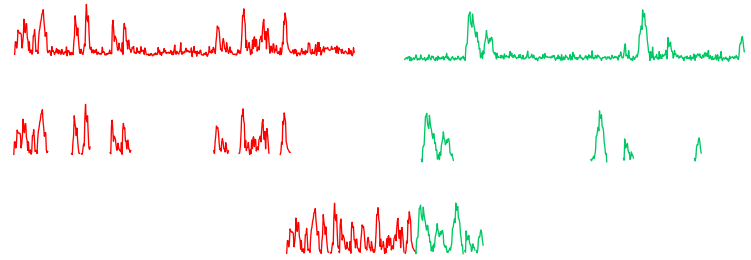

F

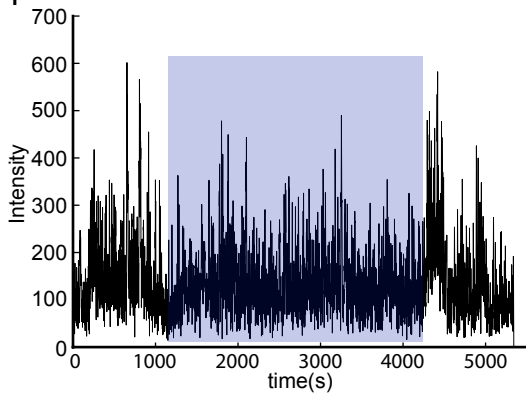

G

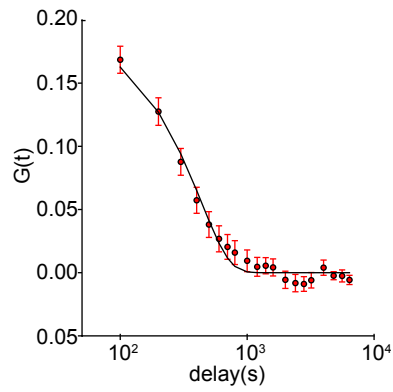

Supplement: NIHMS1514415-supplement-1.pdf [file NIHMS1514415-supplement-1.pdf]

Figure S2 Related to Figure 2

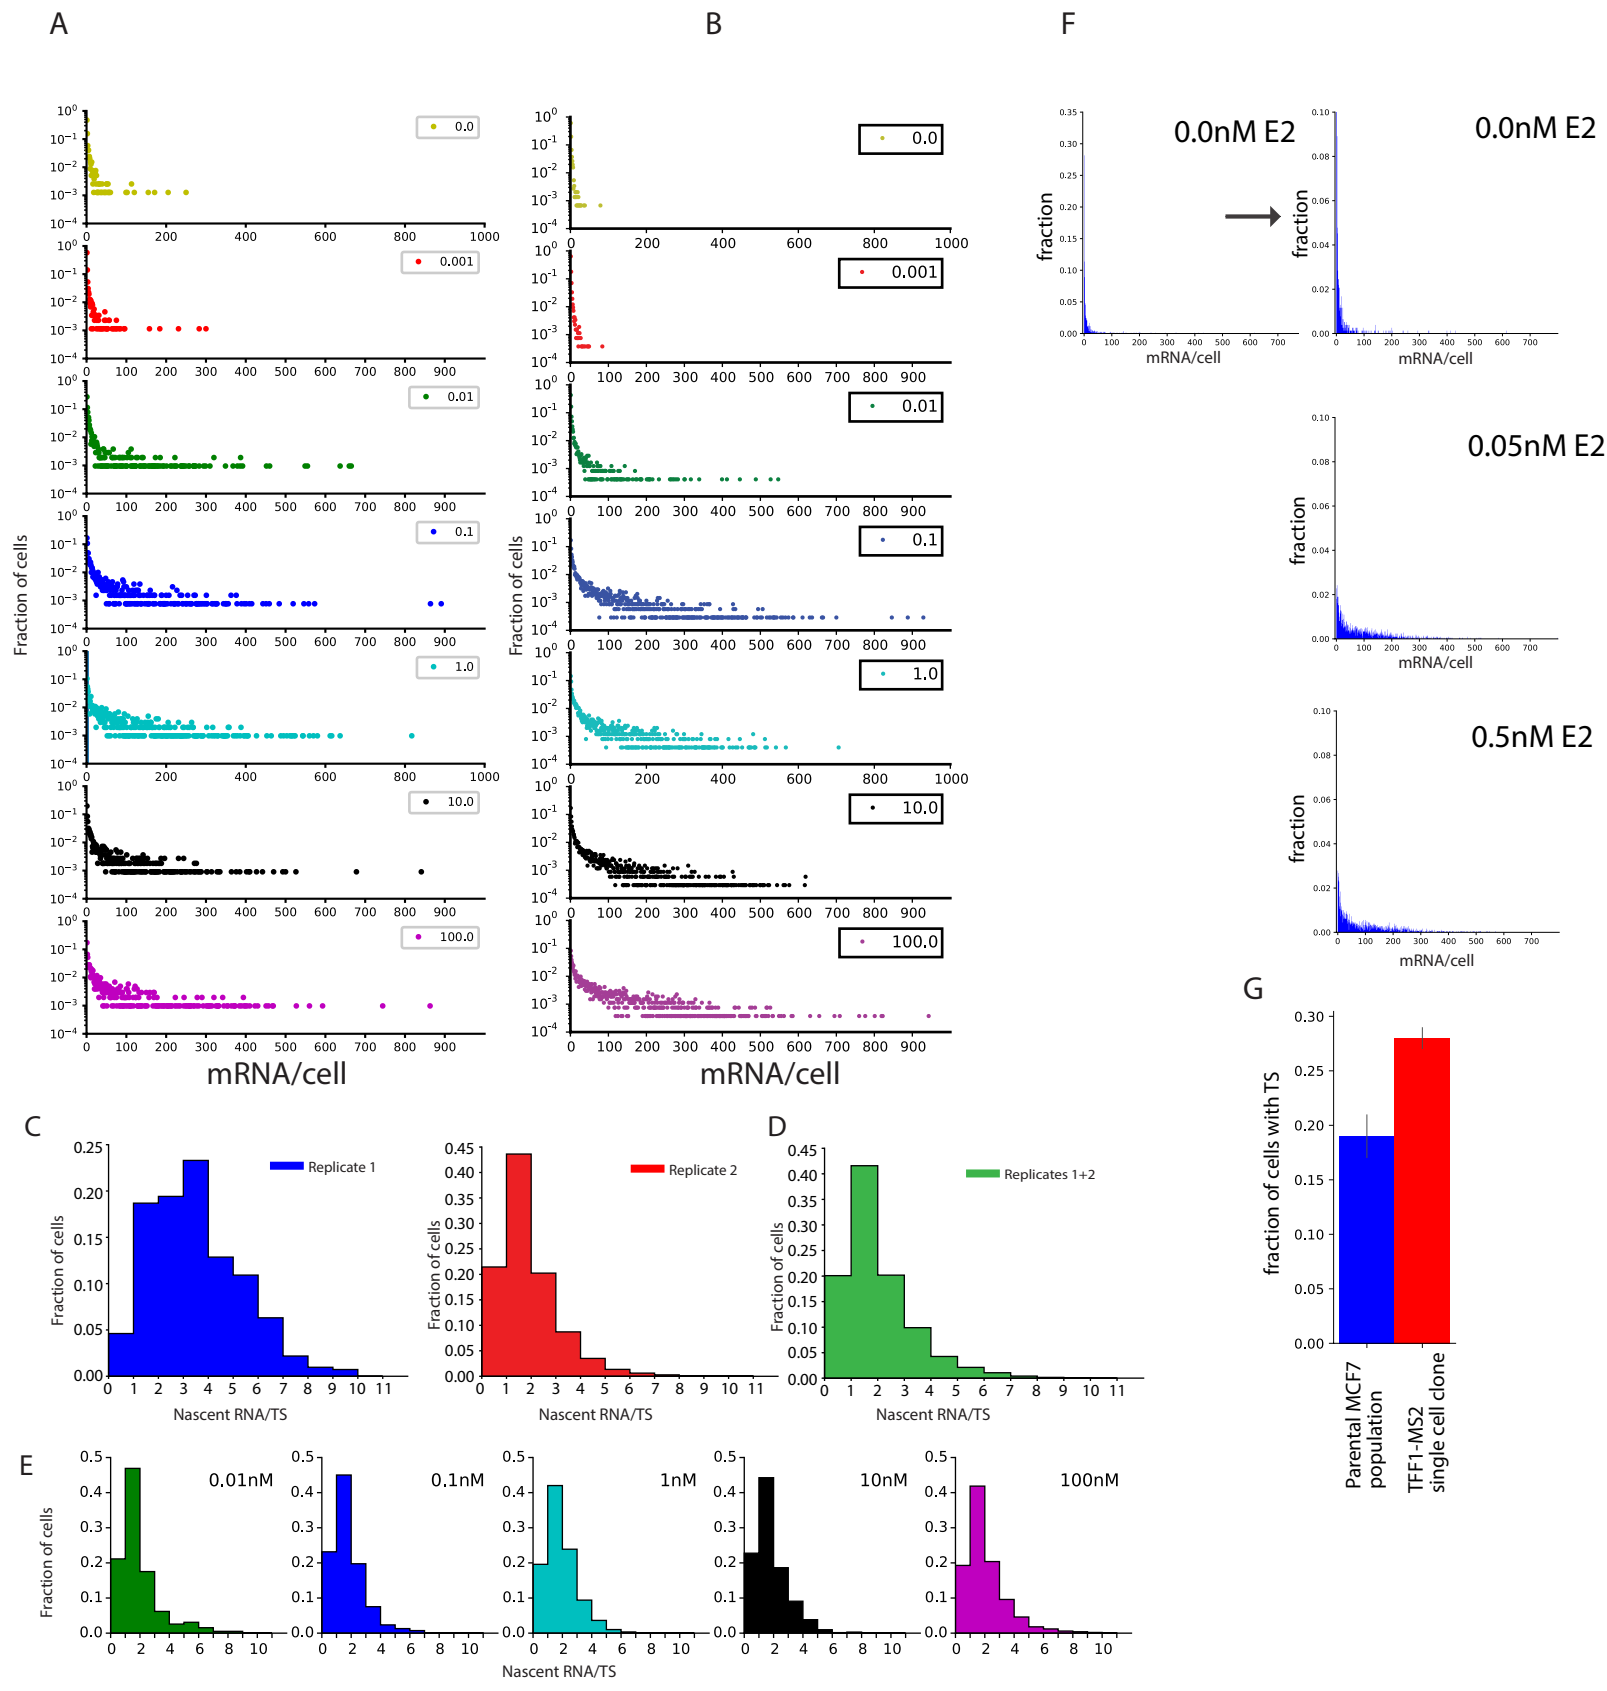

Supplement: NIHMS1514415-supplement-2.pdf [file NIHMS1514415-supplement-2.pdf]

Figure S3 Related to Figure 4

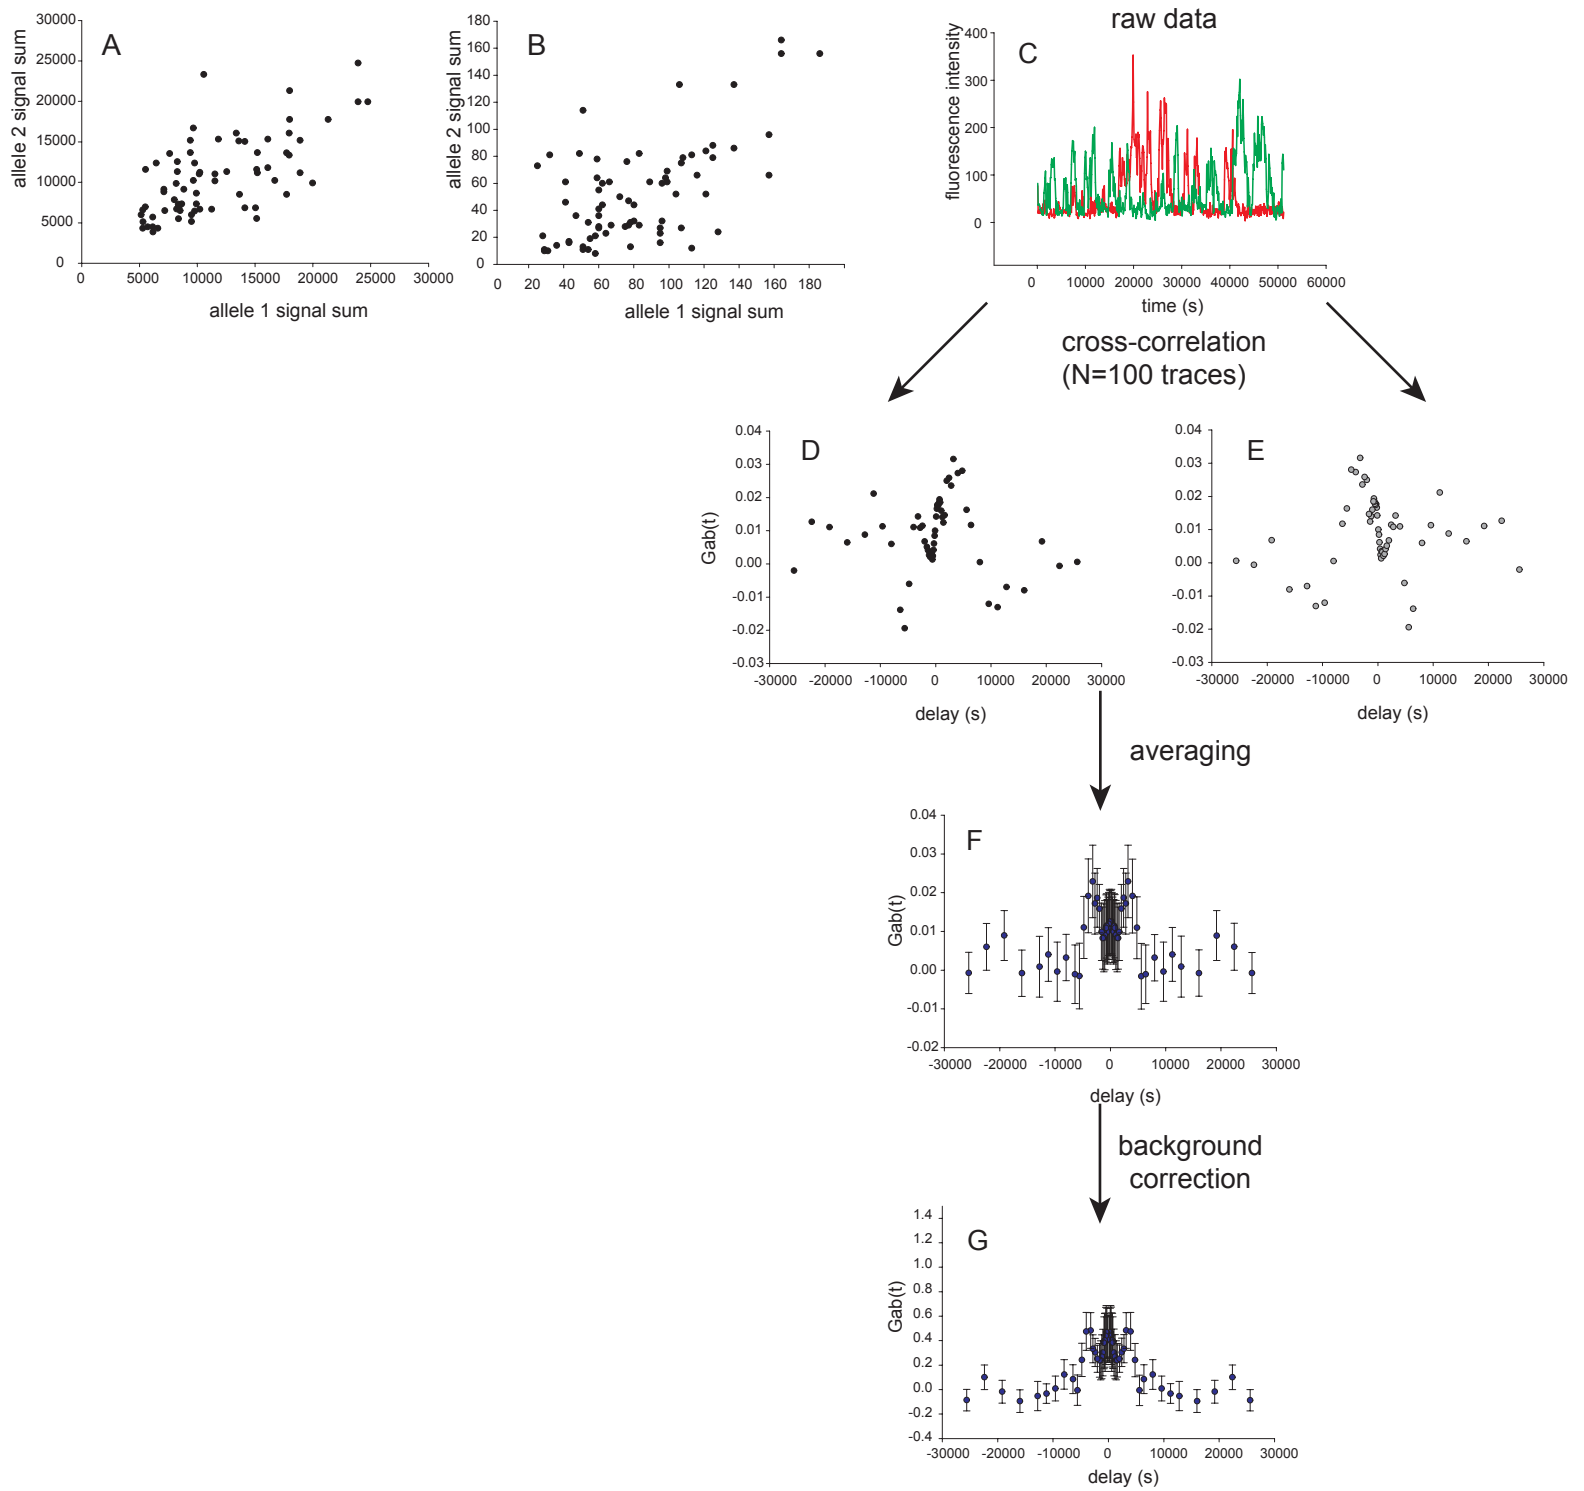

Supplement: NIHMS1514415-supplement-3.pdf [file NIHMS1514415-supplement-3.pdf]

Figure S4 Related to Figure 4

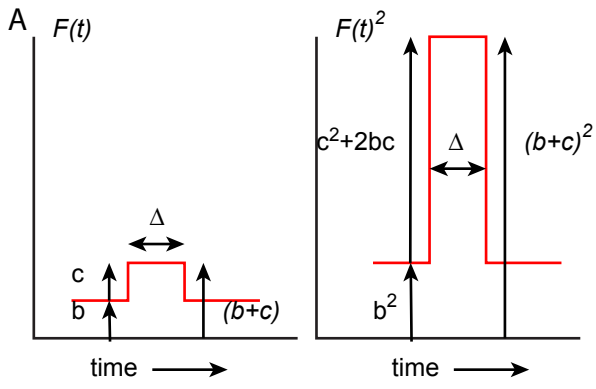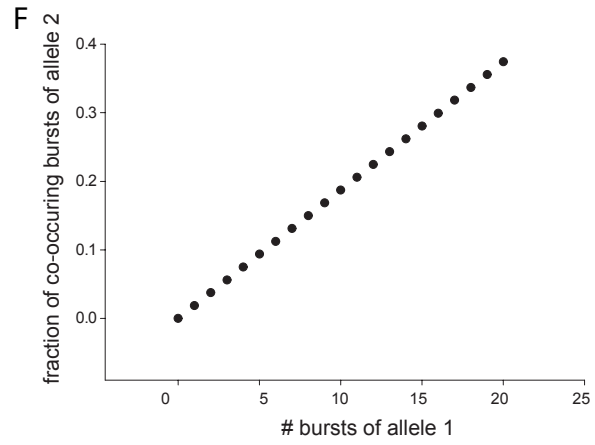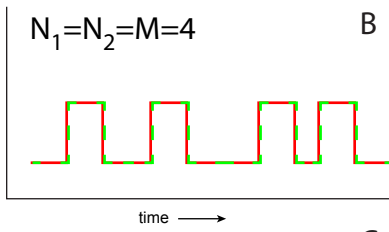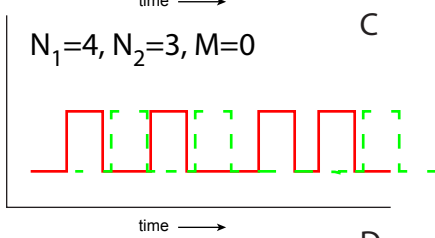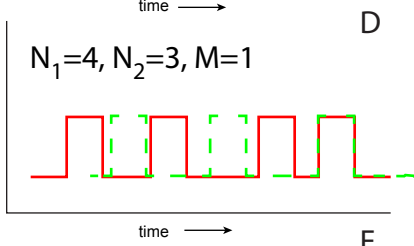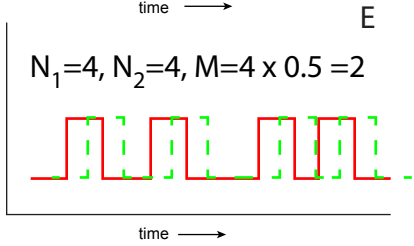

Supplement: NIHMS1514415-supplement-4.pdf [file NIHMS1514415-supplement-4.pdf]

Figure S5 Related to Figure 4

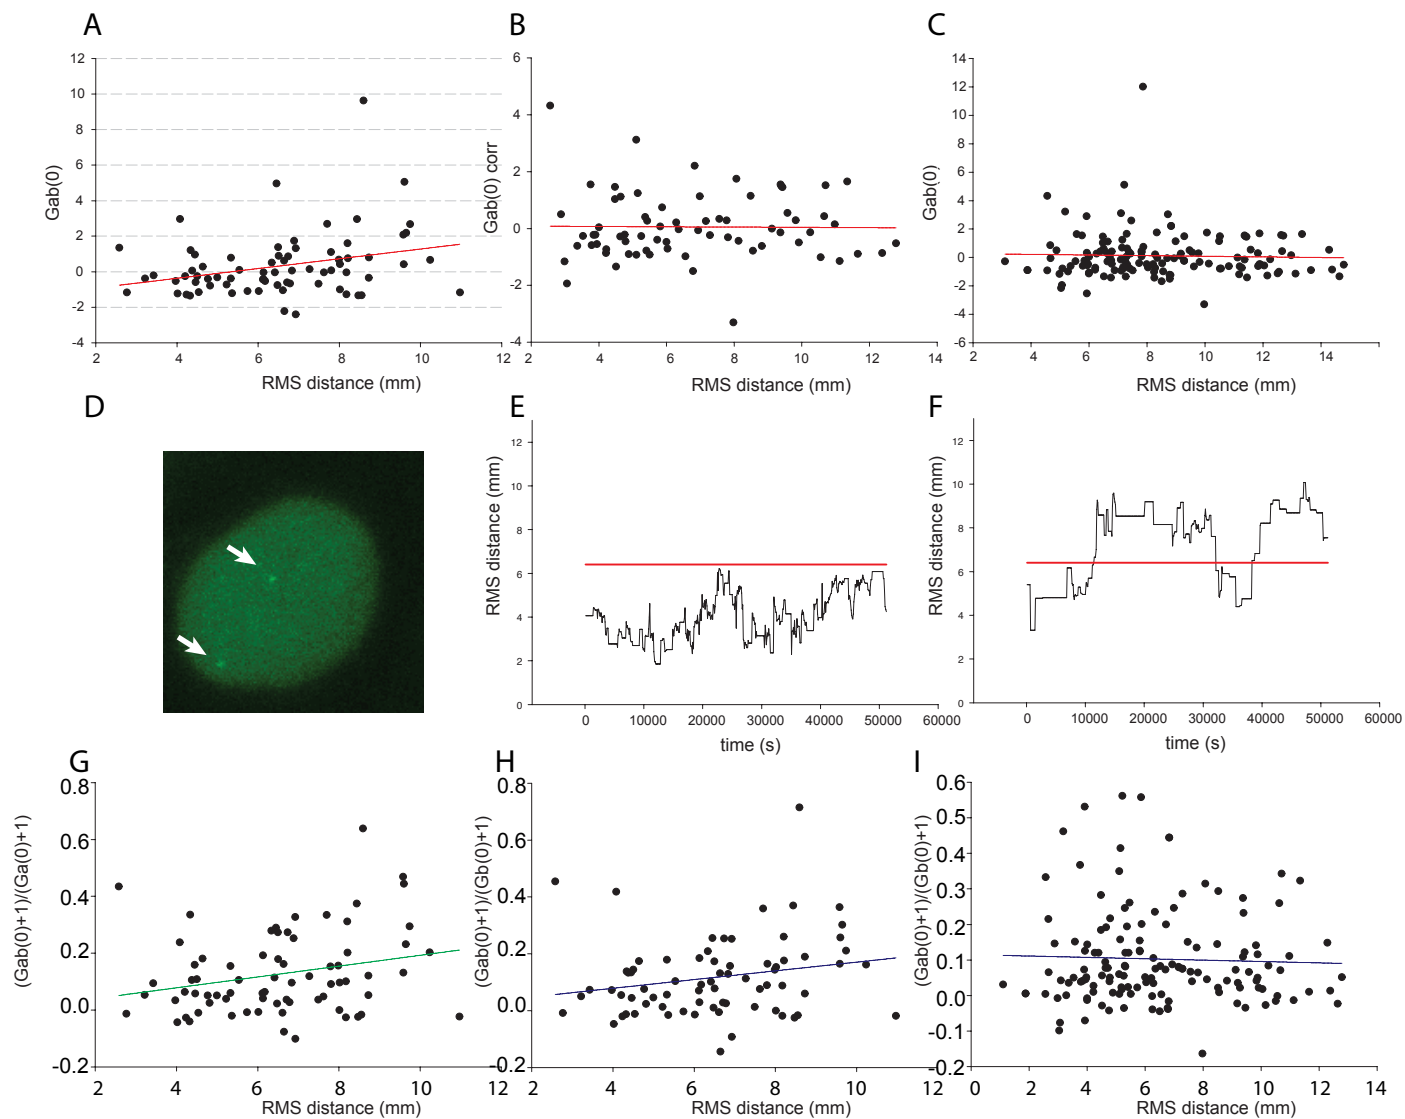

Supplement: NIHMS1514415-supplement-5.pdf [file NIHMS1514415-supplement-5.pdf]

Figure S6 Related to Figure 5

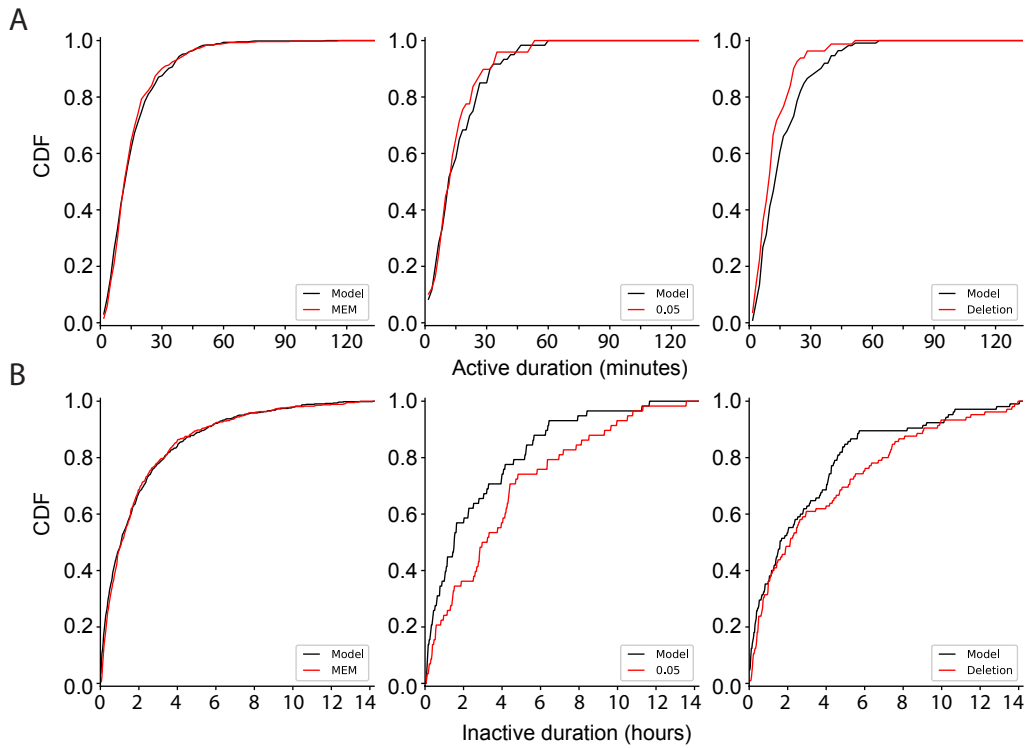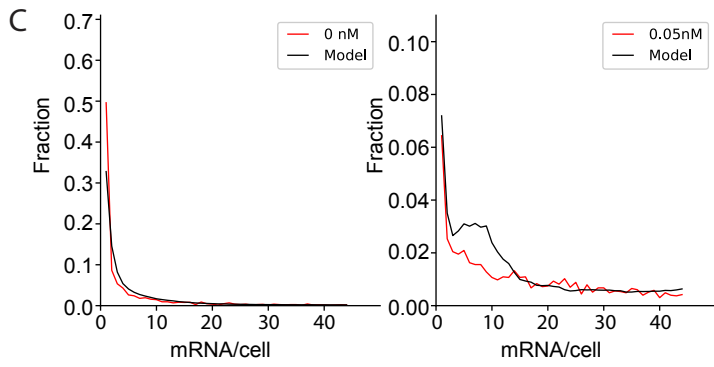

**D**

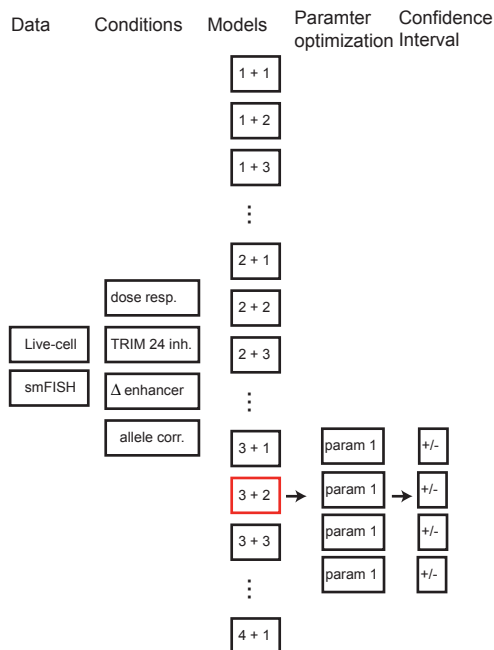

**E**

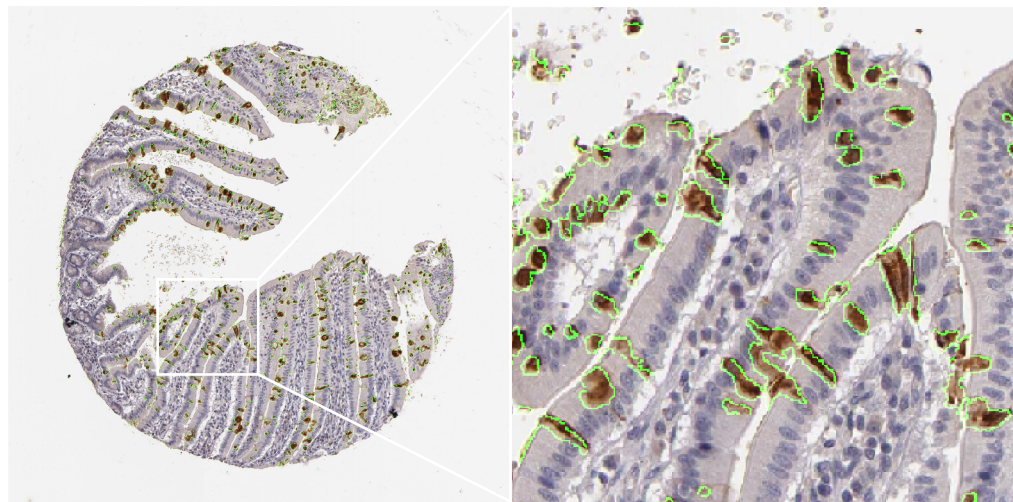

Supplement: NIHMS1514415-supplement-6.pdf [file NIHMS1514415-supplement-6.pdf]

Figure S7 Related to Figure 7

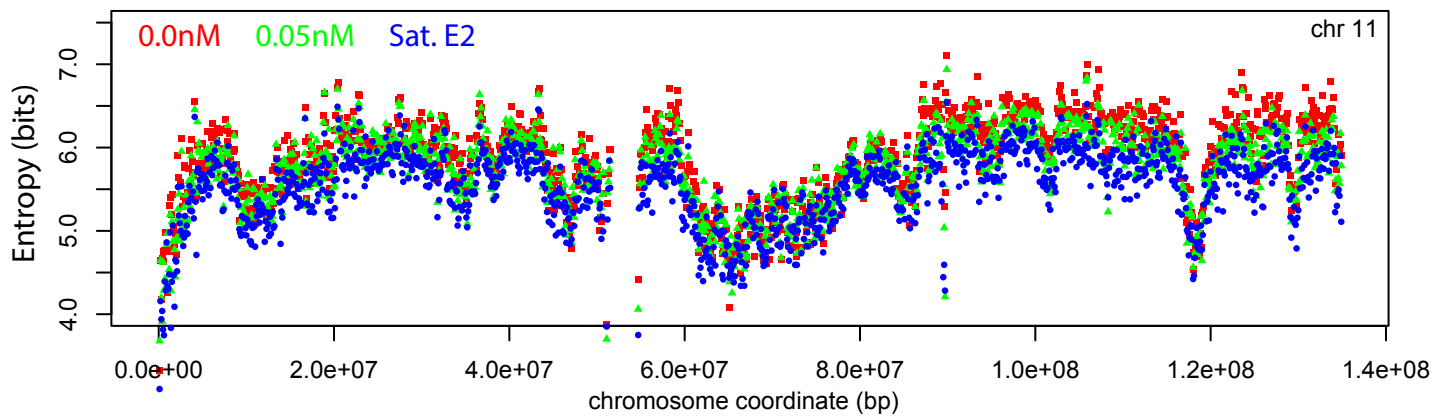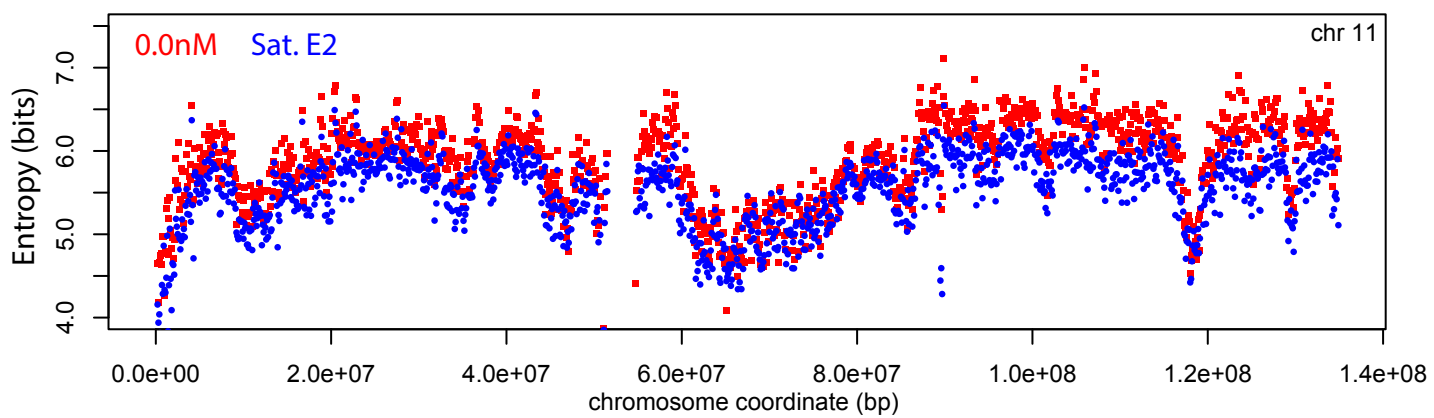

Supplement: NIHMS1514415-supplement-7.pdf [file NIHMS1514415-supplement-7.pdf]
